# Supplementary material for: Critical consumption of chemistry visuals: eye tracking structured variation and visual feedback of redox and precipitation reactions
Source: Royal Society of Chemistry journal article supplement (doi:10.1039/c9rp00015a), 2019-01-01

Appendix 1: Graphic Organizer provided for students to organize their notes while watching the animations.

| Please list aspects of each animation that are ACCURATE/INACCURATE | Evidence of a reaction taking place | Conductivity evidence |
|--------------------------------------------------------------------|-------------------------------------|-----------------------|
| <b>Accurate</b>                                                    |                                     |                       |
| <b>Inaccurate</b>                                                  |                                     |                       |

Link to download animations:

[http://www.sjsu.edu/people/resa.kelly/general\\_chemistry\\_animations\\_and\\_videos/index.html](http://www.sjsu.edu/people/resa.kelly/general_chemistry_animations_and_videos/index.html)

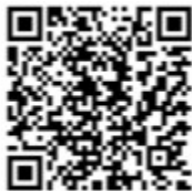

Supplement: c9rp00015a1.pdf [file c9rp00015a1.pdf]
